# Supplementary material for: Uncooperative patients suspected of acute stroke ineligible for prehospital stroke screening test by emergency medical service providers: final hospital diagnoses and characteristics
Source: PubMed Central journal article supplement — Clin Exp Emerg Med. 2023 Feb 14;10(2):213–23. doi: 10.15441/ceem.22.372 (PMC10350364; doi:10.15441/ceem.22.372), 2023-02-14
Supplement: ceem-22-372-supplementary-Table-1.pdf [file ceem-22-372-supplementary-Table-1.pdf]

**Supplementary Table 1.** Overestimation or underestimation effects of the emergency medical services stroke screening policy for the uncooperative group

| 100,000 Population<br>(stroke prevalence, 3%) | Scenario 2 (real-world approach) |          |         | Scenario 3 (contrapositive approach) |          |         |
|-----------------------------------------------|----------------------------------|----------|---------|--------------------------------------|----------|---------|
|                                               | Positive                         | Negative | Total   | Positive                             | Negative | Total   |
| Stroke                                        | 2,499                            | 501      | 3,000   | 1,983                                | 1,017    | 3,000   |
| Stroke mimic                                  | 24,056                           | 72,944   | 97,000  | 7,857                                | 89,143   | 97,000  |
| Total                                         | 26,555                           | 73,445   | 100,000 | 9,840                                | 90,160   | 100,000 |
